# Supplementary material for: Water isotope variations in the global ocean model MPI-OM
Source: Copernicus journal article supplement (doi:10.5194/gmd-5-809-2012), 2012-06-05
Supplement: Supplementary file 1 [file gmd-5-809-2012-supplement.pdf]

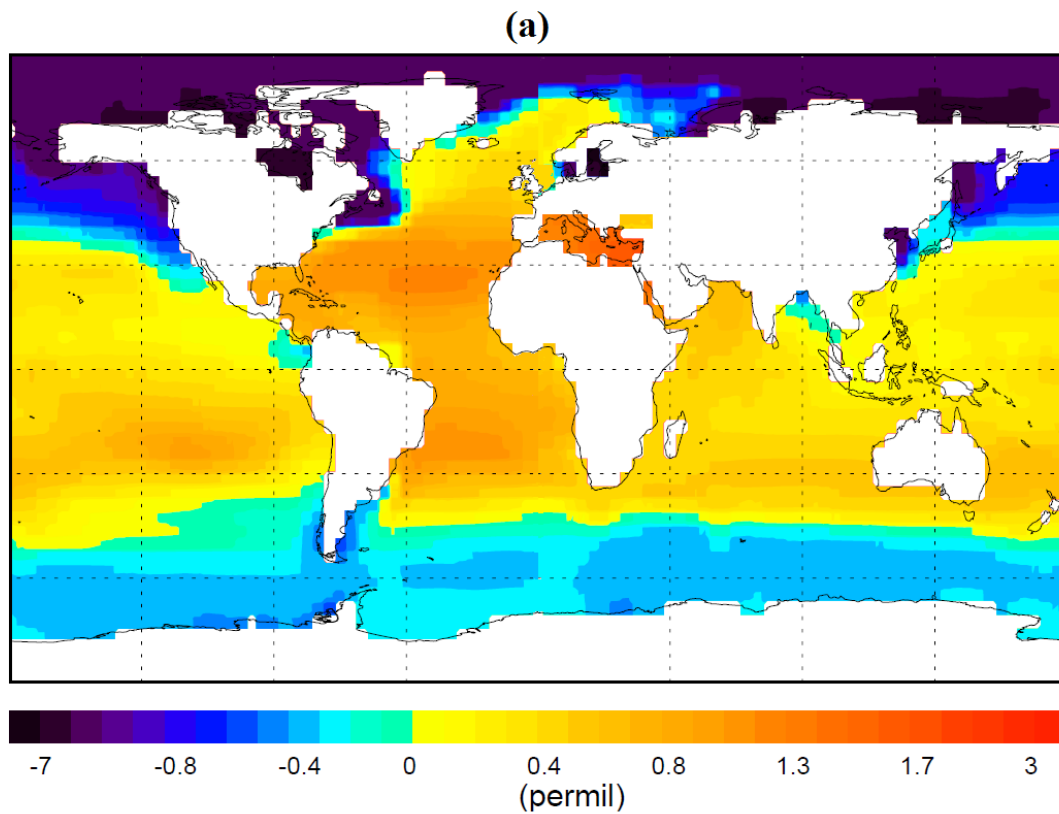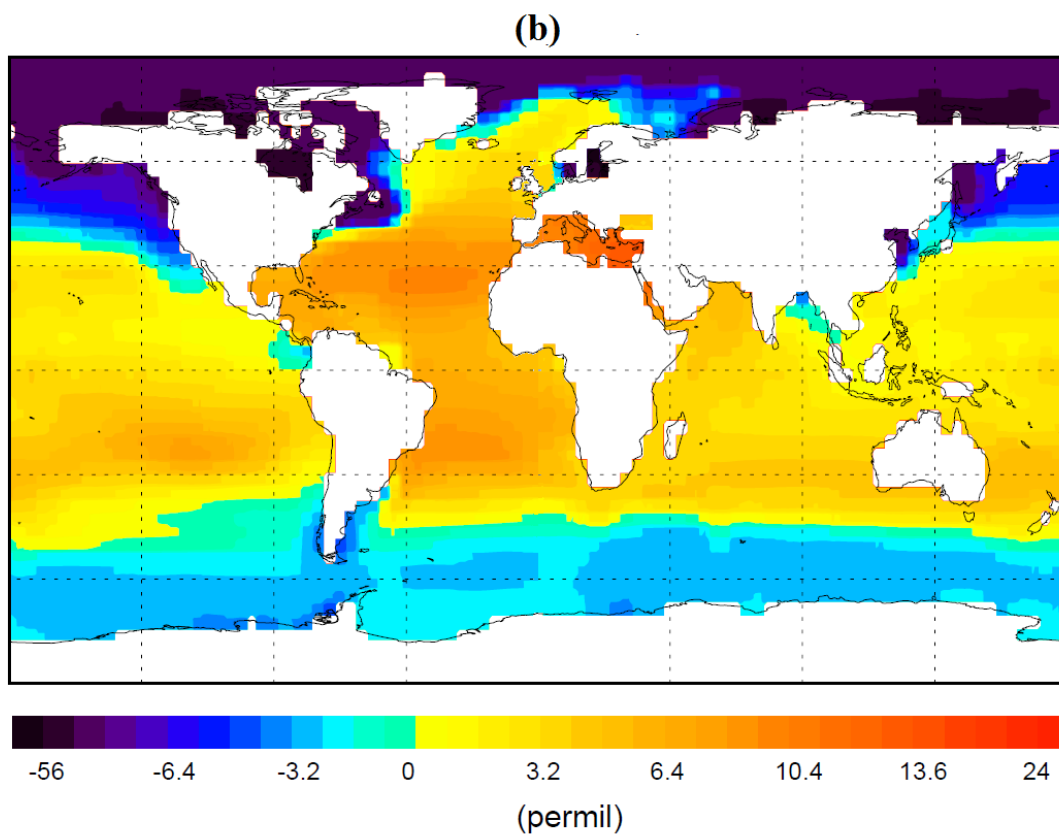

1  
2 Figure 1S. The prescribed (a)  $\delta^{18}\text{O}$  and (b)  $\delta\text{D}$  distribution in ocean surface waters in  
3 ECHAM5-wiso.
